# 1 **Are *Caenorhabditis elegans* magnetoreceptive?**

2

3 Lukas Landler<sup>1</sup>, Simon Nimpf<sup>1</sup>, Tobias Hochstoeger<sup>1</sup>, Gregory Charles Nordmann<sup>1</sup>,

4 Artemis Papadaki-Anastasopoulou<sup>1</sup>, David Anthony Keays<sup>1\*</sup>

5

6 <sup>1</sup>Research Institute of Molecular Pathology, Campus Vienna Biocenter 1, Vienna,

7 1030, Austria

8 \*Corresponding author, Ph 43(1) 79730 3530. Fax 43 1 798 71 53. E-mail:

9 keays@imp.ac.at

10

11

## Abstract

A diverse array of species on the planet employ the Earth's magnetic field as a navigational aid. As the majority of these animals are migratory, their utility to interrogate the molecular and cellular basis of the magnetic sense is limited. Vidal-Gadea and colleagues recently argued that the worm *C. elegans* possesses a magnetic sense that guides their vertical movement in soil. In making this claim they relied on three different behavioural assays that involved magnetic stimuli. Here, we set out to replicate their results employing blinded protocols and double wrapped coils that control for heat generation. We find no evidence for a magnetic sense in *C. elegans*, and demonstrate that iron-contamination from the laboratory setting can result in false positive results. We further show that the Vidal-Gadea hypothesis is problematic as the adoption of a correction angle relative to the Earth's magnetic inclination does not necessarily result in vertical movement.

## Introduction

The ability to sense the Earth's magnetic field is a widespread sensory faculty in the animal kingdom. Magnetic sensation has been shown in migratory birds (Merkel and Wiltschko, 1965; Zapka et al., 2009), mole rats (Nemec et al., 2001), pigeons (Wu and Dickman, 2012), and turtles (Lohmann et al., 2004). While behavioral evidence supporting the existence of a magnetic sense is unequivocal, the underlying sensory mechanisms and neuronal circuitry that transduce and integrate magnetic information are largely unknown. A major impediment to progress in the field is the lack of genetic and molecular tools in magnetosensitive species. One such model system could be the nematode *Caenorhabditis elegans*, which has proved to be a powerful tool to explore a wide variety of senses. It has been claimed by Vidal-Gadea et al. (2015) that *C. elegans* possess a magnetic sense which can easily be exploited for mechanistic investigation (see also Bainbridge et al., 2016). They argue that *C. elegans* possess a magnetic sense that is employed for vertical orientation, worms adopting a correction angle relative to the inclination of the Earth's magnetic field. This conclusion was based on results from three assays which they developed: (1) a "vertical burrowing assay"; (2) a "horizontal plate assay"; and (3) a "magnetotaxis assay". Here, we set out to replicate the aforementioned behavioral assays, adopting several critical controls that were absent in the original study.

## Results

### Benzaldehyde Control Experiment

We established a positive control for our experiments employing the odorant benzaldehyde. It has been shown that if worms are placed in the center of a petri-dish and given the choice between 1% benzaldehyde and 100% ethanol they are attracted to the benzaldehyde. Conversely, if worms are pre-exposed to 100% benzaldehyde their preference is disrupted (Nuttley et al., 2001). Employing blinded

protocols we found that worms preferred 1% benzaldehyde ( $n=11$ ,  $p<0.005$ , Wilcoxon signed rank test), which was lost when pre-exposed to 100% benzaldehyde (Figure 1A-B, Figure Supplement 1). These results show that we are able to replicate published *C. elegans* chemotaxis experiments in our laboratory.

### **Infrastructure and double wrapped coils**

To perform the magnetic experiments described by Vidal-Gadea and colleagues we built the necessary infrastructure to insure that our experiments were performed in a clean magnetic environment. This consists of 6 double-wrapped Helmholtz coils, within a mu-metal shielded room that is surrounded by a faraday cage (Figure 2A-C). Radio frequency contamination within this room is very low, with intensities below 0.1nT between 0.5 to 5MHz (see Figure 2A-B). This infrastructure is critical for applying magnetic stimuli in a controlled fashion.

### **Vertical Burrowing Assay**

In the first magnetic assay described by Vidal-Gadea, starved animals were injected into agar-filled plastic pipettes (Figure 3A). Worms were allowed to migrate overnight, and the number on each end of the tube were counted. In the absence of an external field the authors reported that animals preferentially migrated downwards, however, when exposed to an inverted Earth strength magnetic field worms migrated upwards. This preference was reversed in the case of fed animals. We repeated these experiments, but observed no effect of inverting the magnetic field on the burrowing index when the worms were starved (Mann-Whitney U-test,  $n_1=38$ ,  $n_2=40$ ,  $U=681$ , n. s.) or fed (Mann-Whitney U-test, inclination down:  $n_1=20$ ,  $n_2=35$ ,  $U=300$ , n. s.) (Figure 3B).

84

## 85 **Horizontal Plate Assay**

86 In their second behavioural assay, Vidal-Gadea placed  $\approx 50$  worms in the center of an  
 87 agar plate (Figure 3C). This plate was placed within a single wrapped Merritt coil  
 88 system which permitted the generation of either null or horizontal magnetic fields of  
 89 Earth strength intensity (either  $32.5\mu\text{T}$  or  $65\mu\text{T}$ ). They reported that in the absence of  
 90 magnetic stimuli worms displayed no directional preference, whereas in the presence  
 91 of a horizontal field worms distributed in a biased direction  $60^\circ$  either side of the  
 92 imposed vector. We replicated these experiments, treating each plate as an  
 93 experimental unit. Blind analysis of worm orientation revealed no effect on orientation  
 94 behavior when applying a  $32.5\mu\text{T}$  stimulus (Rayleigh-test,  $r=0.20$ ,  $n=24$ , n. s) or a  
 95  $65\mu\text{T}$  stimulus (Rayleigh-test,  $r=0.25$ ,  $n=24$ , n. s., Figure 3D). Nor did we observe any  
 96 directional preference in our control experiments ( $32.5\mu\text{T}$ : Rayleigh-test,  $r=0.10$ ,  
 97  $n=24$ , n. s.;  $65\mu\text{T}$ : Rayleigh-test,  $r=0.11$ ,  $n=24$ ).

98

## 99 **Magnetotaxis Assay**

100 In their third behavior assay worms were placed in the center of a horizontal agar  
 101 plate between two different goal areas (Figure 3E). An extremely strong neodymium  
 102 magnet generating a field up to  $0.29\text{T}$  (approximately 8,000 times Earth strength),  
 103 was placed beneath one of the goal areas. Vidal-Gadea reported that in the absence  
 104 of this magnet worms were distributed evenly between the goal areas, however, if the  
 105 magnet was present worms migrated towards it. We replicated their set up placing a  
 106 strong neodymium magnet under one goal area, but added an equally size non-  
 107 magnetic brass control under the opposing goal area. We observed no preference for  
 108 the goal area associated with the neodymium magnet ( $n=49$  plates,  $P>0.5$ , Wilcoxon  
 109 signed rank test, Figure 3F). As false-positives in magnetoreception have been  
 110 associated with contamination of biological material with exogenous iron we asked  
 111 whether this might influence the behavior of worms (Edelman et al., 2015). We tested

this by growing worms on agar plates spiked with magnetite particles, and repeated the magnetotaxis assay. We found a weak but significant preference for the goal area under which the magnet resided (Wilcoxon signed rank test,  $n=29$ ,  $V=670.5$ ,  $P=0.042$ , Figure 3F).

## Discussion

Why are our results different from those of Vidal-Gadea? We have gone to great lengths to employ the same protocols. We have used worms from the same source, we have employed the same neodymium magnets, we have used the same assay plates, and the same synchronization and starvation protocols. There were, however, a number of important differences. First, we have used double wrapped coils for our experiments (Kirschvink, 1992). Our large double wrapped coils allow the application of a magnetic stimulus without generating a change in temperature compared to the control condition. In contrast the small single wrapped coils employed by Vidal-Gadea generate a temperature gradient. This is problematic when dealing with *C. elegans* as it is known that they can reliably detect temperature changes that are  $<0.1^{\circ}\text{C}$  (Ramot et al., 2008). Second, we used strict blinding procedures in all our assays, assuring an unbiased assessment of the worm responses. While Vidal-Gadea report blinding when comparing different genotypes, they do not report blinding to the magnetic condition. Third, we have applied the appropriate statistical methodology when analysing our data from the horizontal plate assay. Vidal-Gadea placed  $\approx 50$  worms on a plate treating each worm as a biological replicate. However, as worms tested on the same plate can interact with each other, they are not true independent biological replicates. The approach adopted by Vidale-Gadea is known as pseudoreplication, as it confuses the number of data points with the number of independent samples, increasing the probability of rejecting the null hypothesis whilst it is actually true (Lazic, 2010).

140

141

142 Moreover, there are a number of conceptual issues that undermine the assertion that  
 143 *C. elegans* are magnetosensitive. First, the magnetotaxis assay relies on a  
 144 permanent magnet that (in the absence of a particularly thick layer of agar) generates  
 145 a magnetic vector that is perpendicular (i.e. 90°) with respect to the plate surface  
 146 (Figure 4A). As a consequence, neither the polarity nor the inclination, of the field can  
 147 be employed as a cue for guidance. It is the equivalent of placing worms on the  
 148 magnetic north pole – all directions are south. Worms would have to rely on variation  
 149 in magnetic intensity to direct their movement. As *C. elegans* live in a geographically  
 150 restrained environment in which there is, in effect, no change in magnetic intensity it  
 151 seems improbable that they would have evolved an intensity-based magnetic sense.  
 152 An alternative explanation for this "magnetotactic behavior" could be that exogenous  
 153 iron particles attached to, or ingested by the worm, might, in the presence of an  
 154 extremely large magnetic field influence the direction of locomotion by applying a  
 155 force to surface mechanoreceptors.

156

157 More troubling is the underlying hypothesis that nematodes adopt a correction angle  
 158 ( $\alpha$ ) relative to the inclination of the field to guide their vertical movement. Imagine a  
 159 nematode is located in Cairo where the inclination of the Earth's magnetic vector is  
 160 44° 33'. To migrate vertically (i.e. 90°) it should adopt a correction angle of  
 161 approximately 45° to the magnetic vector and maintain that trajectory (Figure 4B).  
 162 Assuming that nematodes cannot distinguish up from down, the adoption of a 45°  
 163 angle from the inclination of the field is just as likely to result in horizontal movement  
 164 (180°) as vertical translation (90°). This problem is exacerbated as the correction  
 165 angle increases (e.g. 60°) (Figure 4C). The concept proposed by Vidal-Gadea is only  
 166 an efficient strategy if the worms are using the 'correction angle' in relation to an  
 167 independent reference (i.e. gravity). However, if worms are able to distinguish up

from down based on gravity, why would they rely on a magnetic field vector? In conclusion, we were not able to replicate the findings of Vidal-Gadea and colleagues. It is pertinent to note that other attempts to elicit magnetoreceptive behavior in *C. elegans* have also been unsuccessful (Njus et al., 2015). Collectively, these data indicate that *C. elegans* is not a suitable model system to understand the molecular basis of magnetoreception.

## **Methods and Materials**

### **Animals**

Worms (N2 strain, received from Caenorhabditis Genetics Center) were maintained at 20°C on OP50 bacteria. For all assays we used adult hermaphrodite worms that had not previously been starved. Worms were synchronized (bleached) before the tests to make sure animals of the same age were employed for behavioural analysis. Worms referred to as 'fed' were always tested within 10 mins of being removed from the culture plate. 'Starved' animals were kept in liquid Nematode Growth Media (NGM) for  $\approx$ 30min.

### **Chemotaxis experiments**

For our chemotaxis experiments we used 100mm petri dishes filled with 3% chemotaxis agar as test plates. Employing a template we marked each of the test plates with one center release point (see Figure 3E) and two smaller 'scoring' circles (diameter: 3.5cm). Sodium azide (1.5 $\mu$ l of 1M) was applied to the center of each of the scoring circles to immobilize the worms (Nuttley et al., 2001). Worms were picked from the culture plates and collected in a small drop of NGM on a parafilm strip. In order to reduce bacterial contamination we carefully removed liquid containing bacteria and replaced it with new NGM. Worms were pipetted onto the center of the assay plate and 1 $\mu$ l 1% benzaldehyde solution (in ethanol) was applied to one scoring circle and 1 $\mu$ l 100% ethanol was applied to the other scoring circle. The



plates were covered with aluminum foil and placed in the shielded room and left undisturbed for one hour. For our pre-exposure experiments a strip of parafilm with a 2µl drop of 100% benzaldehyde was placed on the upper inside lid of a plate. After 90 minutes of pre-exposure the worms were tested as described above. For all chemotaxis experiments we tested ≈50 worms per test. A preference index (PI) was calculated by ascertaining the difference between the number of worms reaching the benzaldehyde decision circle (B) and the 100% ethanol decision circle (E) and divided it by the total number of worms scored,  $PI = (B - E) / (B + E)$ .

### **Magnetic coil set-up and magnetic shielding**

For earth-strength magnetic field manipulations we used a double wrapped custom built Helmholtz coil system (Serviciencia, S. L). The coils were located in the center of a 4.4m (long) x 2.9m (wide) x 2.3m (high) shielded room. The room was shielded against static magnetic fields by a 1mm thick layer of Mu-metal and against oscillating electromagnetic fields by an aluminum layer (5mm) (Magnetic Shielding). The 'Inclination down' setting as used in this study comprises a magnetic field vector with a 25µT horizontal component, -42 µT vertical component and an inclination of -59.16°. The vertical component was inverted in the 'inclination up' treatment. Static magnetic fields were measured using a Three-axis Fluxgate Magnetometer (Bartington Instruments). Radio frequencies were measured using an EMI test receiver (Rhode & Schwarz: MNr: LE0056) and an active shielded loop antenna 6507 (EMCO: MNr: E0575). The receiver was put on MAXHOLD and measurements were taken for one minute.

### **Burrowing assay**

We used 24cm long tubes filled with 3% chemotaxis agar (see Figure 3A), each end was closed with a plastic stopper. The tubes contained three small holes (3mm in diameter), one in the center and two 10cm apart from the center hole on either side.

During filling of the tubes great care was taken to avoid air bubbles at the ends of the tubes. Tubes with air bubbles were discarded. 1.5µl of 1M NaN<sub>3</sub> was added to each end-hole of a test tube and ~50 were injected into the center-hole (Figure 3A). The test tube was then covered with aluminum foil and placed upright in a holder. The holder was placed in the shielded room inside a smaller copper Faraday cage (Figure 2C). Tubes were left undisturbed overnight or alternatively over a day. At the conclusion of the test the tubes were removed from the room and worms on either side (3 cm from the end hole) were counted. The ‘Inclination down’ setting as used in this study comprises a magnetic field vector with a 25µT horizontal component, 42µT vertical component and an inclination of -59.16°. The vertical component was inverted in the ‘inclination up’ treatment. These magnetic conditions were identical to those employed by Vidal-Gadea. We calculated the burrowing index (BI) by dividing the difference between worms on either side of the plastic tube (A), (B) by the total number of scoring worms,  $BI = (A - B) / (A + B)$ .

### **Horizontal plate assay**

Non-starved worms (~50) were placed, with a droplet of NGM, on the center of a 100mm style petri dish filled with 3% chemotaxis agar. Sodium azide (0.1 M, 20µl) was applied to the rim of the plate to immobilize the worms once they reached it. Worms were released from the NGM droplet by removing the liquid with a tissue. The plate was then immediately placed in the center of the magnetic coils, described above, and covered with aluminum foil. Animals were tested in one of four magnetic directions (magnetic north pointing towards topographic north, east, south or west), with a field strength of 32.5µT and 65µT (close to the strength of the horizontal component of the Earth’s magnetic field). In addition, we used two control conditions where the double wrapped coils were switched to antiparallel currents, which resulted in a zero magnetic field. We performed this control for the 32.5µT and 65µT field settings. Worms were allowed to move freely on the plate for one hour, then the

position and the direction of each worm relative to the center was recorded. Magnetic field conditions were set by a person not involved in the analysis. Treatments and field conditions were revealed after all worms were counted and the angles measured.

### **Magnetotaxis assay**

We used 100mm style petri dishes filled with 3% chemotaxis agar as test plates, marked with one center release point and two smaller 'scoring' circles. Sodium azide (1.5µl of 1M) was applied to the center of each of the scoring circles to immobilize the worms. We randomly placed a magnet (N42 Neodymium 3.5-cm diameter magnet 5 mm thick and nickel-plated) under one goal area, and a brass coin with identical dimensions as a control under the opposing goal area. The magnet was placed with the magnetic north pole pointing up in all tests. ~50 worms were placed in the central release point with a droplet of NGM. After the worms were released by removing the liquid the plate was covered quickly with aluminum foil and placed in the shielded room. After one hour the number of worms in each goal area were counted blind. It should be noted that Vidal-Gadea performed this experiment over 30mins, however, our pilot experiments showed that a longer time resulted in a higher percentage of worms in the goal areas. For our iron contamination experiments the OP50 (in solution) was mixed thoroughly with magnetite to create a 1% magnetite/OP50 solution. Worms were then synchronized and grown on OP50 covered plates until they reached adulthood. Experiments were performed as described above. In order to avoid cross-contamination separate picks were used for the magnetite and non-magnetite trials. To calculate the preference index (PI) the number of worms on the magnetic side (M) were subtracted by the number of worms on the control side (C) and then divided by the total number of scoring worms,  $PI = (M - C) / (M + C)$ .

## Statistics

In all tests the experimenter was blind to the particular treatment when counting the worms. A one-tailed Wilcoxon test was used to analyse the chemotaxis and magnetotaxis experiments. For the burrowing assay we used a two-tailed Wilcoxon one-sample test to ascertain if worms burrowing preference differed from zero. In order to compare groups we used a Mann–Whitney U test. All linear statistical tests were performed in R (R Development Core Team, 2012). The circular data from the horizontal plate assay were analyzed using Oriana 4. We define a true biological replicate as a treatment application on one independent experimental unit (e.g. plate with worms), in contrast to a technical replicate which simply involves multiple measurements of the same experimental unit. As worms tested together at the same time on the same plate can interact with each other they do not constitute independent experimental units. Therefore, we calculated one mean orientation vector for each test plate, by calculating the vector sum of all worms from this plate. The directions from the plates, relative to the magnetic field and a geographically fixed direction (topographic north), were then tested for a significant unimodal orientation using the Rayleigh test. A summary of the statistics is shown in Figure Supplement 1.

## Acknowledgements

We wish to thank Boehringer Ingelheim for funding basic research at the Institute for Molecular Pathology. We also wish to acknowledge the IMP-IMBA biooptical facilities and the media kitchen. We are indebted to Manuel Zimmer, Annika Nichols and Harris Kaplan for their assistance with the experiments described in this manuscript. We thank Andres Vidal-Gadea for hosting Lukas Lander in his laboratory. The *C. elegans* strain was provided by the CGC which is funded by NIH Office of Research Infrastructure Programs (P40 OD 010440).

308

## 309 References

- 310 Bainbridge, C., Schuler, A., and Vidal-Gadea, A. (2016). Method for the assessment  
311 of neuromuscular integrity and burrowing choice in vermiform animals. *J*  
312 *Neurosci Methods*.
- 313 Edelman, N.B., Fritz, T., Nimpf, S., Pichler, P., Lauwers, M., Hickman, R.W.,  
314 Papadaki-Anastasopoulou, A., Ushakova, L., Heuser, T., Resch, G.P., *et al.* (2015).  
315 No evidence for intracellular magnetite in putative vertebrate magnetoreceptors  
316 identified by magnetic screening. *Proc Natl Acad Sci* *112*, 262-267.
- 317 Kirschvink, J.L. (1992). Uniform magnetic fields and double-wrapped coil  
318 systems: improved techniques for the design of bioelectromagnetic experiments.  
319 *Bioelectromagnetics* *13*, 401-411.
- 320 Lazic, S.E. (2010). The problem of pseudoreplication in neuroscientific studies: is  
321 it affecting your analysis? *BMC neuroscience* *11*, 5.
- 322 Lohmann, K.J., Lohmann, C.M., Ehrhart, L.M., Bagley, D.A., and Swing, T. (2004).  
323 Animal behaviour: geomagnetic map used in sea-turtle navigation. *Nature* *428*,  
324 909-910.
- 325 Merkel, F.W., and Wiltshko, W. (1965). Magnetismus und Richtungs- finden  
326 zugunruhiger Rotkehlchen (*Erithacus rubecula*). *Vogelwarte* *23*.
- 327 Nemec, P., Altmann, J., Marhold, S., Burda, H., and Oelschlager, H.H. (2001).  
328 Neuroanatomy of magnetoreception: the superior colliculus involved in magnetic  
329 orientation in a mammal. *Science* *294*, 366-368.
- 330 Njus, Z., Feldmann, D., Brien, R., Kong, T., Kalwa, U., and Pandey, S. (2015).  
331 Characterizing the Effect of Static Magnetic Fields on *C. elegans* Using  
332 Microfluidics. *Advances in Bioscience and Biotechnology* *6*, 583.
- 333 Nuttley, W.M., Harbinder, S., and van der Kooy, D. (2001). Regulation of distinct  
334 attractive and aversive mechanisms mediating benzaldehyde chemotaxis in  
335 *Caenorhabditis elegans*. *Learn Mem* *8*, 170-181.
- 336 R Development Core Team (2012). R: A language and environment for statistical  
337 computing (Vienna, Austria: R Foundation for Statistical Computing).
- 338 Ramot, D., MacInnis, B.L., and Goodman, M.B. (2008). Bidirectional temperature-  
339 sensing by a single thermosensory neuron in *C. elegans*. *Nature neuroscience* *11*,  
340 908-915.
- 341 Vidal-Gadea, A., Ward, K., Beron, C., Ghorashian, N., Gokce, S., Russell, J., Truong,  
342 N., Parikh, A., Gadea, O., Ben-Yakar, A., *et al.* (2015). Magnetosensitive neurons  
343 mediate geomagnetic orientation in *Caenorhabditis elegans*. *eLife* *4*, e07493.
- 344 Wu, L.Q., and Dickman, J.D. (2012). Neural correlates of a magnetic sense. *Science*  
345 *336*, 1054-1057.
- 346 Zapka, M., Heyers, D., Hein, C.M., Engels, S., Schneider, N.L., Hans, J., Weiler, S.,  
347 Dreyer, D., Kishkinev, D., Wild, J.M., *et al.* (2009). Visual but not trigeminal  
348 mediation of magnetic compass information in a migratory bird. *Nature* *461*,  
349 1274-1277.

350

351

352

Figure 1

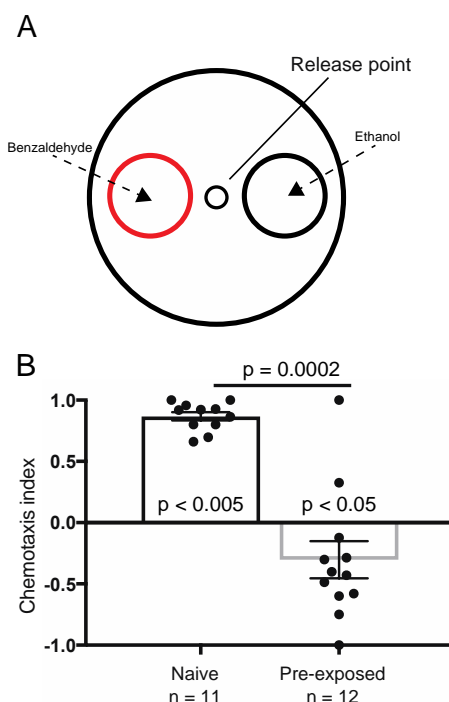

# **Figure 1. Benzaldehyde control experiment**

(A) Experiment set up for the benzaldehyde positive control experiments. Worms were placed at the release point and given a choice between 1% benzaldehyde in ethanol, or 100% ethanol. (B) Naïve worms preferentially orientated towards the benzaldehyde (n=11, P<0.005), and away from it if pre-exposed to benzaldehyde (n=12, P<0.05).

361

Figure 2

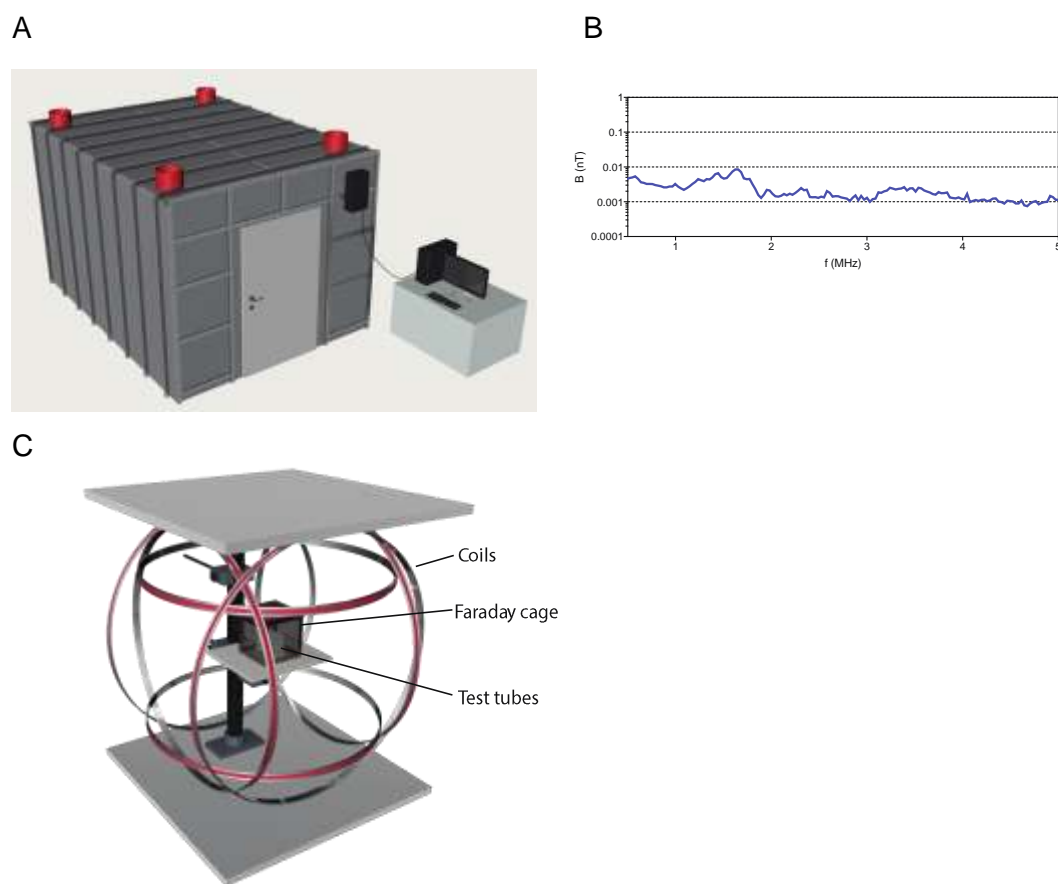

362

363 **Figure 2. Infrastructure for magnetic experiments.**

364 (A) All experiments were performed within a mu metal shielded room surrounded by  
 365 a 5mm aluminum Faraday cage. DC power sources and the computer driving the  
 366 Helmholtz coils were located outside this shielded room, and cables into the room  
 367 were filtered for radio frequencies. (B) Graph showing the radio-frequencies present  
 368 in the shielded room between 0.5 to 5MHz are below 0.01nT, indicative of very low  
 369 levels of radio frequency contamination. (C) Experimental setup for exposure of  
 370 worms to magnetic fields. Three pairs of double-wrapped Helmholtz coils surround a  
 371 plastic stage in the center. Worms were placed on this stage for the vertical  
 372 burrowing, horizontal plate, and magnetotaxis assays. In the burrowing assay we  
 373 surrounded the tubes by an additional small Faraday cage.

Figure 3

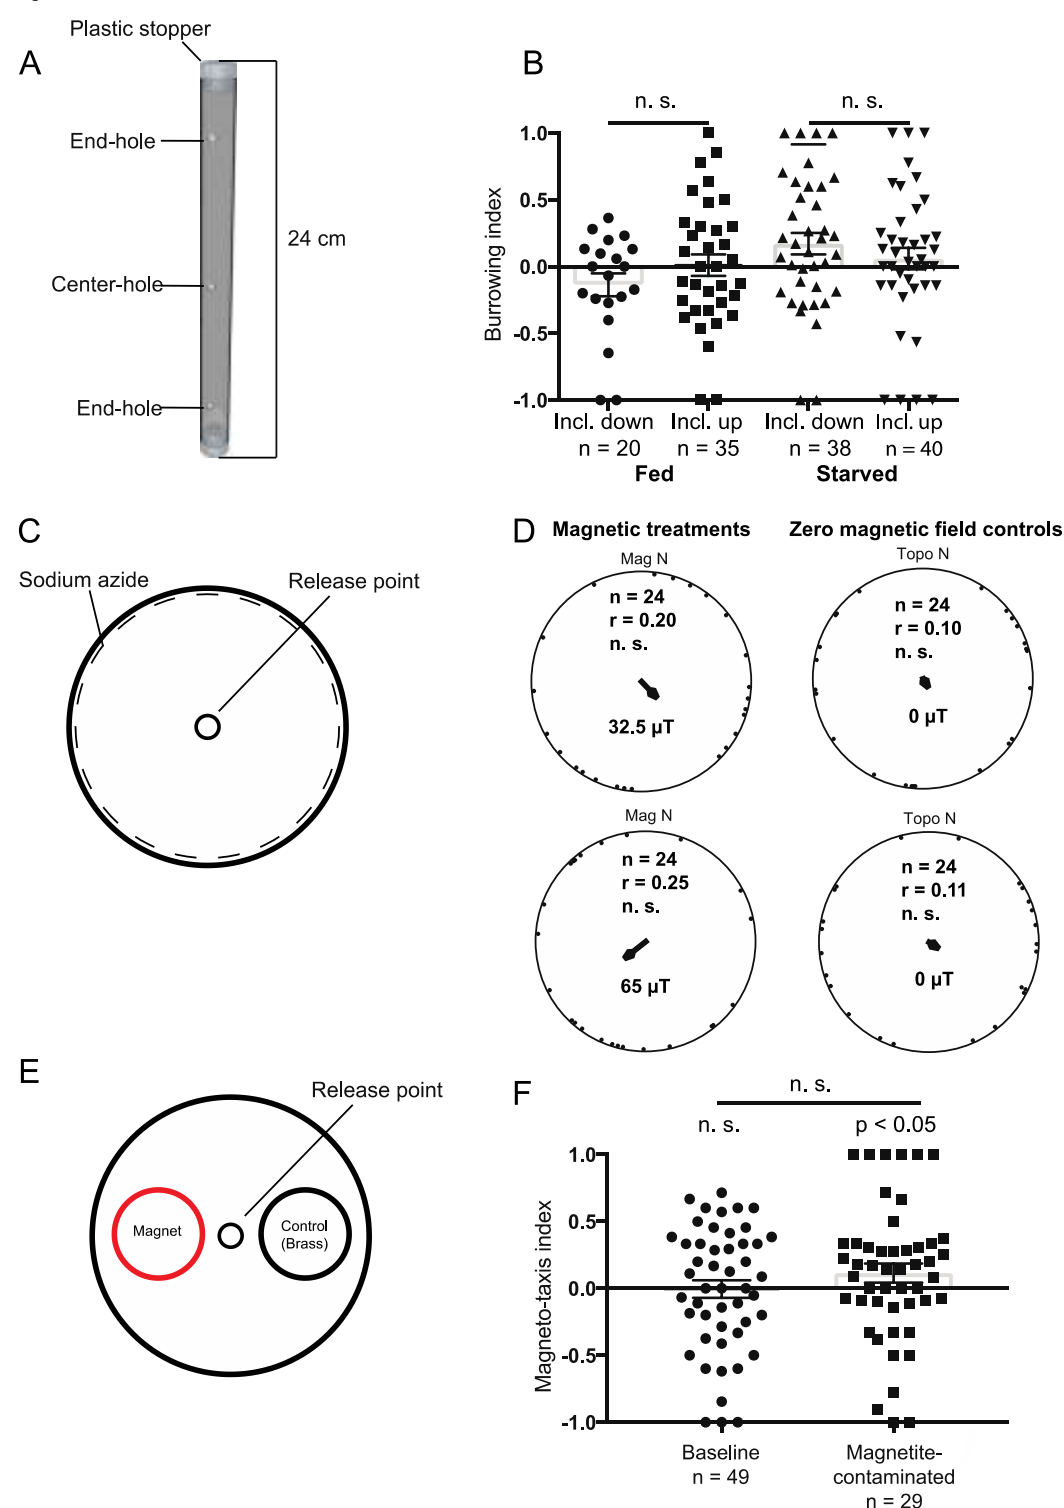

### Figure 3. Magnetic assays and results

(A) Diagram showing the tubes employed for the vertical burrowing assay. Worms were injected in the center hole, and NaN<sub>3</sub> in the end-holes to immobilize them. Fed or starved worms were allowed to burrow overnight with the inclination of the magnetic field either up (59.16°) or down (-59.16°). At the conclusion of the test the worms on either side (3 cm from the end hole) were counted and a preference index calculated. (B) Results for the vertical burrowing assay. We observed no significant difference in the burrowing index when the inclination of the magnetic field was inverted, whether the worms were fed or starved. (C) Set up for the horizontal plate



assay. Worms were released in the center of the plate and allowed to move freely for one hour before the position and the direction of each worm relative to the center was recorded. Animals were tested in one of four magnetic directions (magnetic north pointing towards either topographic north, east, south and west), with a field strength of 32.5 $\mu$ T and 65 $\mu$ T. Control experiments employed antiparallel currents resulting in a zero magnetic field. We calculated one mean orientation vector for each test plate, by calculating the vector sum of all worms from this plate. (D) Results for the horizontal plate assay. We observed no directional preference when worms were exposed to either 32.5 $\mu$ T or 65 $\mu$ T magnetic stimuli. Each dot represents the mean worm direction for one plate, while the black arrow showing the direction and length (r) of the mean vector (radius of the circle is 1). Mag N indicates the normalized magnetic north and Topo N the topographic north. (E) Set up for the magnetotaxis assay. Worms were released in the center of a testing plate and could choose between two 3.5 cm diameter circles (goal areas) with a strong magnet (0.29T) or a brass control underneath. Worms in each of the goal areas were counted and a preference index calculated. (F) We observed no preference for the area above the magnet, unless worms were fed bacteria contaminated with magnetite particles ( $P < 0.05$ ,  $n = 29$  plates). Error bars show standard error of the means.

404

Figure 4

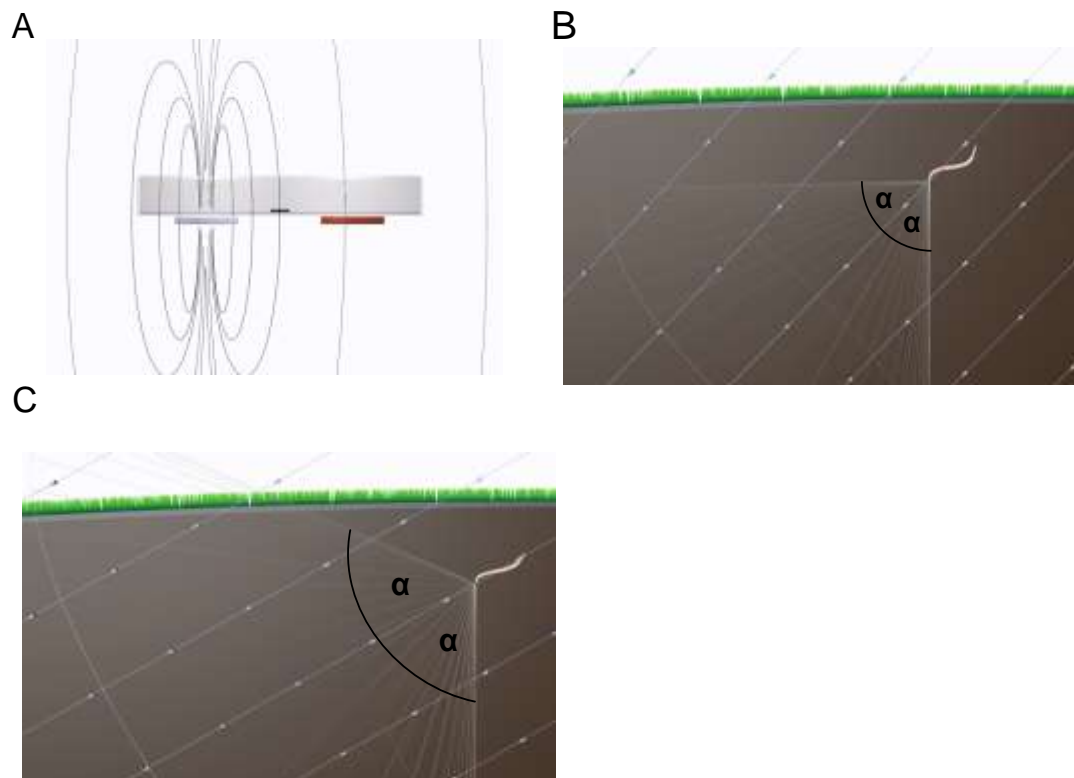

405

# **Figure 4. Conceptual issues with the Vidal-Gadea hypothesis.**

(A) The magnetoaxis assay developed by Vidal-Gadea et al. (2015), relies on worms moving towards a very strong neodymium magnet (0.29T) placed beneath an agar testing plate. The magnetic field lines that emerge from this magnet (in the absence of a thick layer of agar) are perpendicular (i.e. 90°) with respect to the plate surface. As this is analogous to standing on the magnetic north pole of the planet (with all directions being southerly), neither the polarity nor the inclination of the field can be employed by nematodes as a guidance cue. The worms could detect the increasing field intensity when moving towards the magnet, however, an intensity based magnetoreceptor that is sensitive to 8,000 times Earth strength fields is unlikely to have evolved on our planet. (B) The hypothesis advanced by Vidal-Gadea and colleagues argues that nematodes exploit the inclination of the Earth's magnetic field to guide vertical movement. They propose that nematodes adopt a correction angle ( $\alpha$ , e.g. 45°) relative to the inclination of the field, which varies depending on the latitude. However, in the absence of gravitational information this is as likely to result in a worm that travels horizontally as vertically. (C) As the latitude nears the equator the correction angle increases (e.g. 60°), and consequently a worm is just as likely to translate downwards, or at an oblique angle towards the Earth's surface. The blue lines show the magnetic field vector.

425

| Assay      | Satiation state | Sample size naïve | Sample size pre-exposed | p-value    | critical value |
|------------|-----------------|-------------------|-------------------------|------------|----------------|
| Chemotaxis | fed             | n = 11            | n = 12                  | p = 0.0002 | U = 10         |
| Chemotaxis | fed             | n = 11            | NA                      | p = 0.002  | V = 66         |
| Chemotaxis | fed             | NA                | n = 12                  | p = 0.036  | V = 15.5       |

**Statistical test**

Mann-Whitney U-test (two tailed)

Wilcoxon signed rank test (one sided)

Wilcoxon signed rank test (one sided)
